# Supplementary material for: CoP2/Fe-CoP2 yolk–shell nanoboxes as efficient electrocatalysts for the oxygen evolution reaction
Source: Royal Society of Chemistry journal article supplement (doi:10.1039/d0nr08108f), 2021-01-01
Supplement: d0nr08108f1.pdf [file d0nr08108f1.pdf]

# Supporting Information

## CoP<sub>2</sub>/Fe-CoP<sub>2</sub> yolk-shell nanoboxes as efficient electrocatalysts for oxygen evolution reaction

Vinoth Ganesan,<sup>a</sup> Ji-Hye Son,<sup>b</sup> and Jinkwon Kim<sup>a\*</sup>

<sup>1</sup>*Department of Chemistry, Kongju National University,*

*56 Gongjudaehak-ro, Gongju-si, Chungnam-do, 32588, Republic of Korea.*

*E-mail: jkim@kongju.ac.kr; Fax: +82-41-850-8613; Tel: +82-41-850-8496*

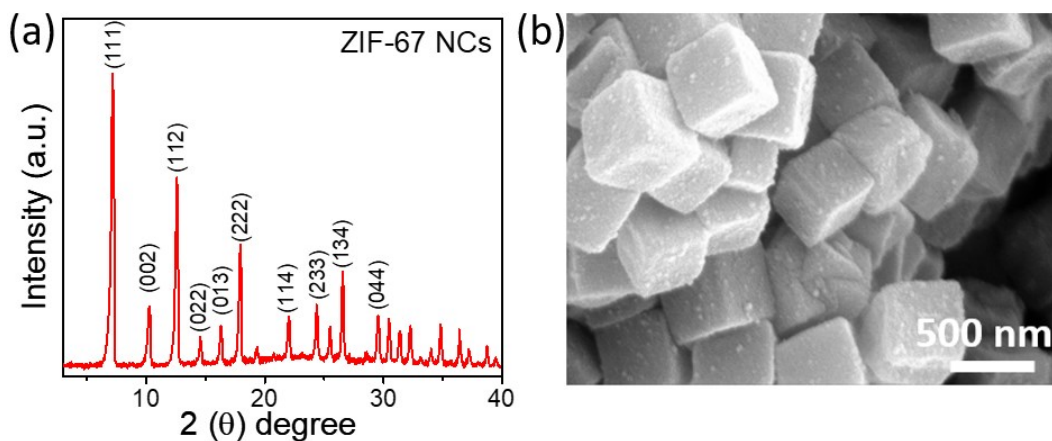

**Fig. S1.** (a) XRD pattern of ZIF-67 NCs. (b) Corresponding XRD pattern.

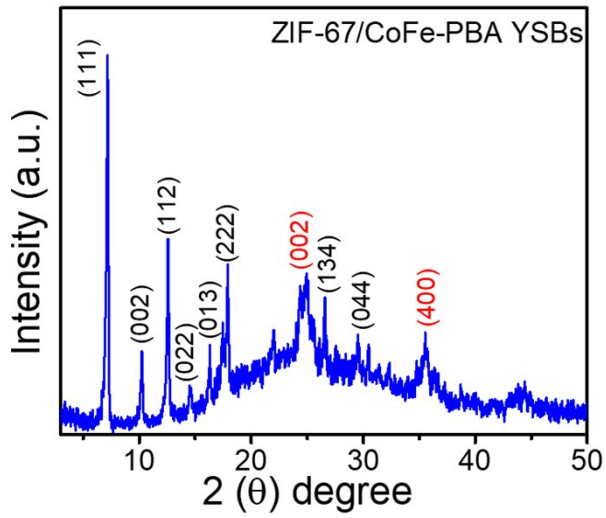

**Fig. S2.** XRD pattern of ZIF-67/CoFe-PBA YSBs.

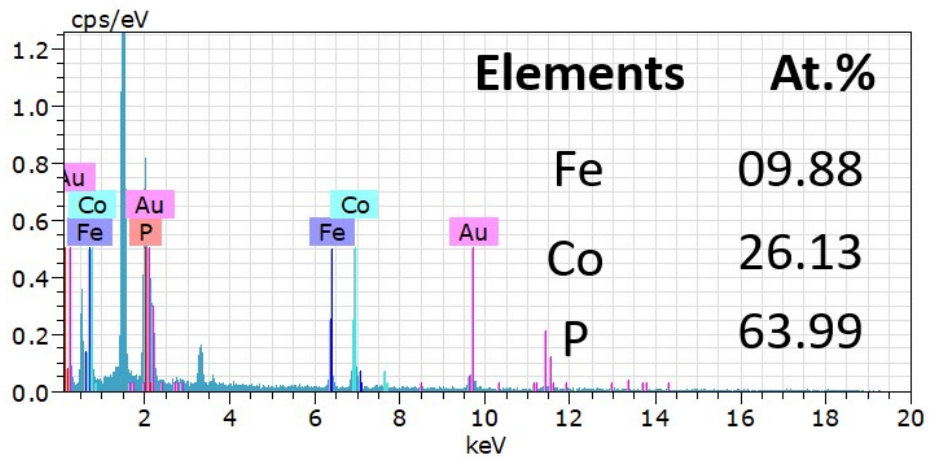

**Fig. S3.** EDS spectrum of CoP<sub>2</sub>/Fe-CoP<sub>2</sub> YSBs.

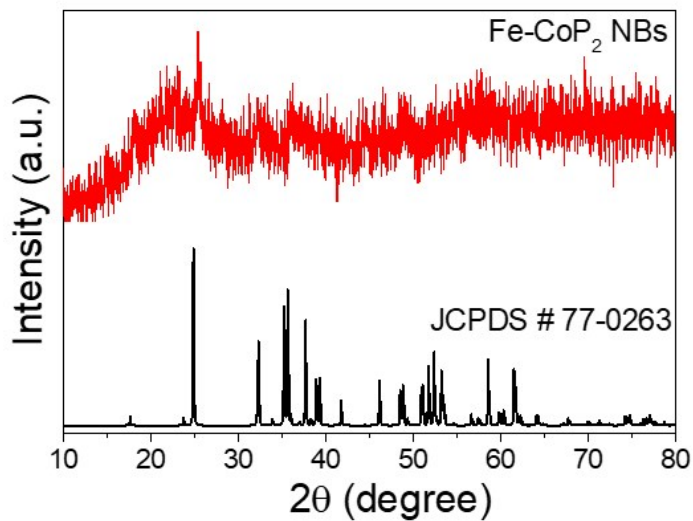

**Fig. S4.** XRD pattern of Fe-CoP<sub>2</sub> NBs.

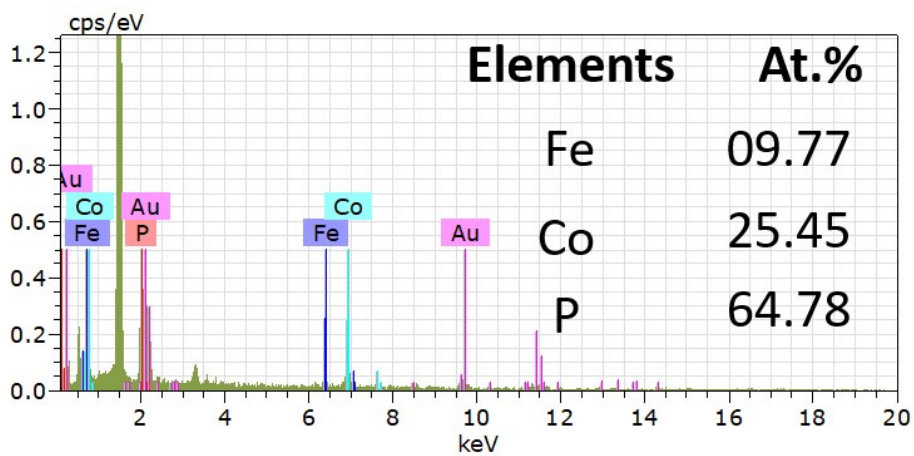

**Fig. S5.** EDS spectrum of Fe-CoP<sub>2</sub> NBs.

### Synthesis of $\text{CoP}_2$ nanocubes (NCs).

The ZIF-67 NCs and  $\text{NaH}_2\text{PO}_2$  put in two separate porcelain boats at a mass ratio of 1:20 respectively. The boat with  $\text{NaH}_2\text{PO}_2$  was placed on the upper stream side of the furnace. Subsequently the mixture was heated to  $300\text{ }^\circ\text{C}$  with incremental rate of  $5\text{ }^\circ\text{C min}^{-1}$  and maintained for 2 h in an under a Ar atmosphere. After cooling to room temperature, the product was collected and used for further analysis.

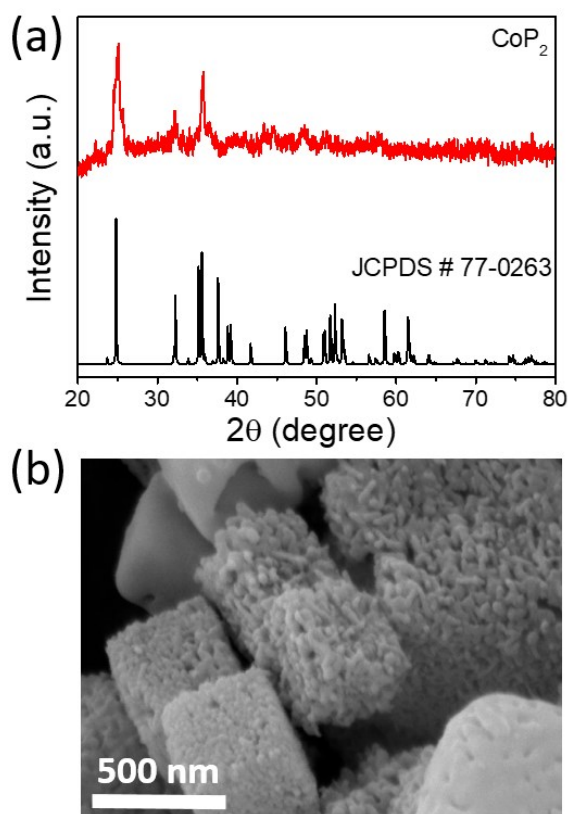

**Fig. S6.** (a) XRD pattern (b) corresponding SEM images of  $\text{CoP}_2$  NCs.

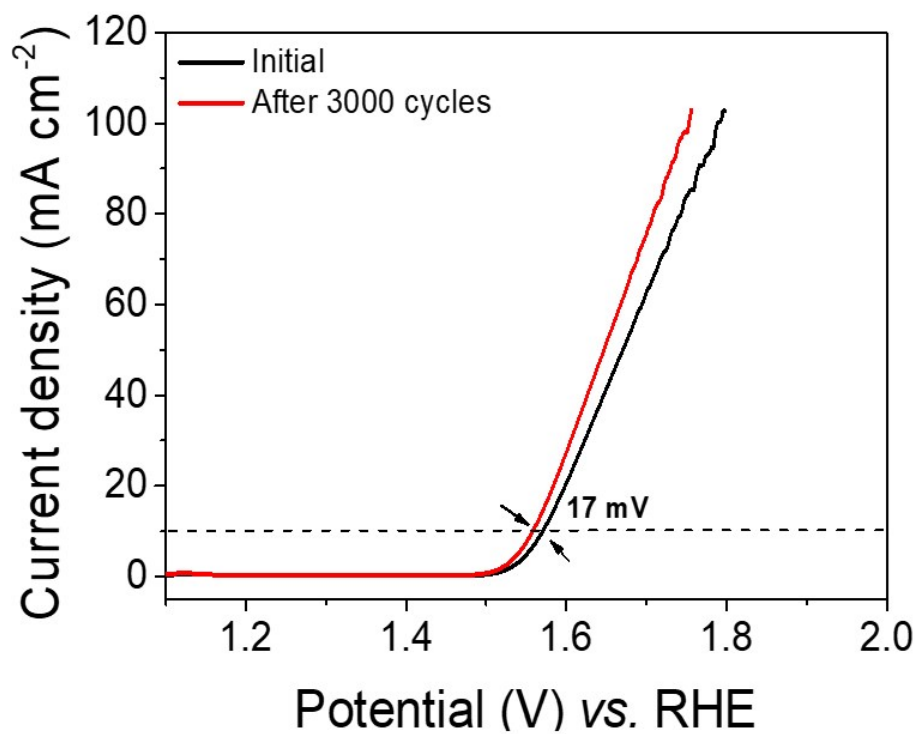

**Fig. S7.** OER curve of Fe-CoP<sub>2</sub> NBs before and after 3000 cycles.

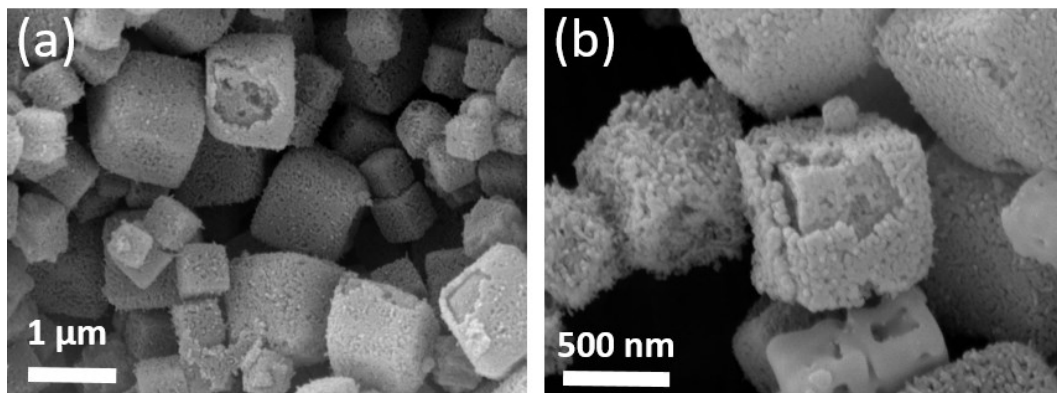

**Fig. S8.** (a,b) SEM images of CoP<sub>2</sub>/Fe-CoP<sub>2</sub> YSBs after 10 hour stability test.

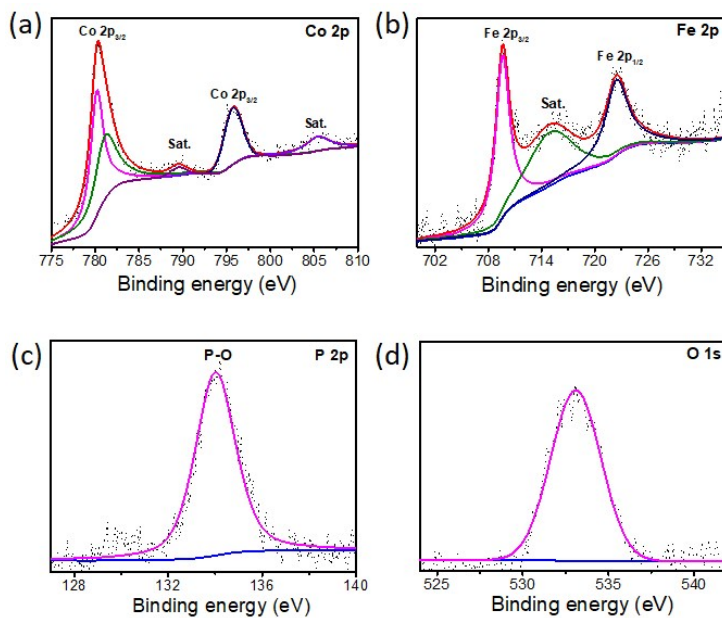

**Fig. S9.** High resolution XPS spectra of (a) Co 2p, (b) Fe 2p, (c) P 2p, and (d) O 1s for CoP<sub>2</sub>/Fe-CoP<sub>2</sub> YSBs after OER.

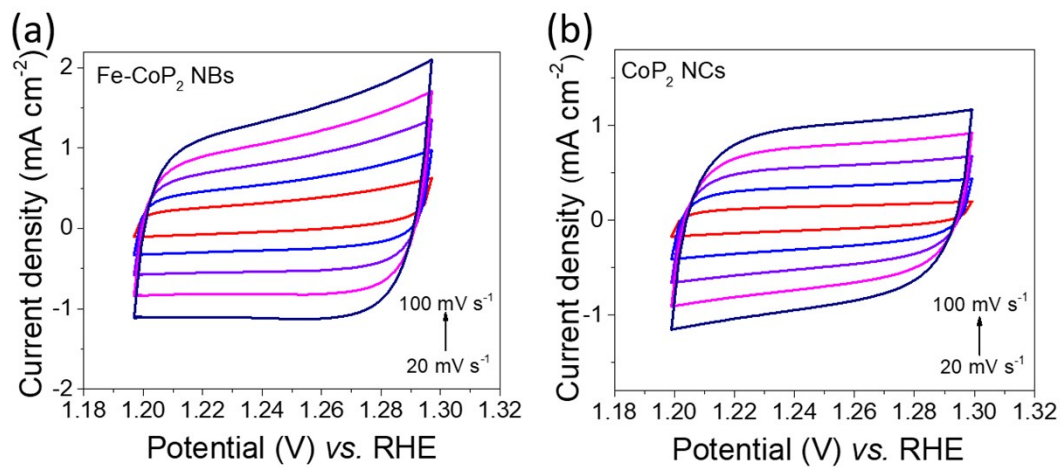

**Fig. S10.** Cyclic voltammogram curves at different scan rates of (20-100 mV s<sup>-1</sup>). (a) Fe-CoP<sub>2</sub> NBs and (b) CoP<sub>2</sub> NCs.
